# Supplementary material for: Endogenous 3-Iodothyronamine (T1AM) and Synthetic Thyronamine-Like Analog SG-2 Act as Novel Pleiotropic Neuroprotective Agents through the Modulation of SIRT6
Source: PubMed Central journal article supplement (PMC7179148; doi:10.3390/molecules25051054), 2020-02-26
Supplement: molecules-25-01054-s001.pdf [file molecules-25-01054-s001.pdf]

**Endogenous 3-Iodothyronamine (T1AM) and synthetic thyronamine-like analog SG-2 act as novel pleiotropic neuroprotective agents through the modulation of SIRT6**

Lorenza Bellusci<sup>1#</sup>, Massimiliano Runfola<sup>2#</sup>, Vittoria Carnicelli<sup>1</sup>, Simona Sestito<sup>1</sup>, Federica Fulceri<sup>3</sup>, Filippo Santucci<sup>4</sup>, Paola Lenzi<sup>5</sup>, Francesco Fornai<sup>5,6</sup>, Simona Rapposelli<sup>2,7</sup>, Nicola Origlia<sup>8</sup>, Riccardo Zucchi<sup>1</sup> and Grazia Chiellini<sup>1\*</sup>

<sup>1</sup>Laboratory of Biochemistry, Department of Pathology, University of Pisa, Pisa, Italy; [lorenza.bellusci@student.unipi.it](mailto:lorenza.bellusci@student.unipi.it) (L.B.); [vittoria.carnicelli@unipi.it](mailto:vittoria.carnicelli@unipi.it) (V.C.); [simona.sestito@for.unipi.it](mailto:simona.sestito@for.unipi.it) (S.S.); [riccardo.zucchi@med.unipi.it](mailto:riccardo.zucchi@med.unipi.it) (R.Z.)

<sup>2</sup>Laboratory of Medicinal Chemistry, Department of Pharmacy, University of Pisa, Pisa, Italy; [massimiliano.runfola@farm.unipi.it](mailto:massimiliano.runfola@farm.unipi.it) (M.R.); [simona.rapposelli@unipi.it](mailto:simona.rapposelli@unipi.it) (S.R.)

<sup>3</sup>Department of Clinical and Experimental Medicine, University of Pisa, Pisa, Italy; [federica.fulceri@unipi.it](mailto:federica.fulceri@unipi.it) (F.F.)

<sup>4</sup>Sant'Anna School of Advanced Studies, Pisa, Italy; [f.santucci@santannapisa.it](mailto:f.santucci@santannapisa.it) (F.S.)

<sup>5</sup>Unit of Human Anatomy, Department of Translational Research and New Technologies in Medicine and Surgery, University of Pisa, Pisa, Italy; [paola.lenzi@med.unipi.it](mailto:paola.lenzi@med.unipi.it) (P.L.); [francesco.fornai@med.unipi.it](mailto:francesco.fornai@med.unipi.it) (F.F.)

<sup>6</sup>IRCCS Neuromed, Pozzilli, Italy (F.F.)

<sup>7</sup>Interdepartmental Research Centre of Ageing Biology and Pathology, University of Pisa, Pisa, Italy (S.R.)

<sup>8</sup>National Research Council (CNR), Institute of Neuroscience, Pisa, Italy; [nicola.origlia@in.cnr.it](mailto:nicola.origlia@in.cnr.it) (N.O.)

\* Correspondence: [grazia.chiellini@unipi.it](mailto:grazia.chiellini@unipi.it) (G.C.); Tel.: +39 050 2218662 (G.C.)

# L.B and M.R equally contributed

## Supplementary Figures

### Suppl. Figure 1

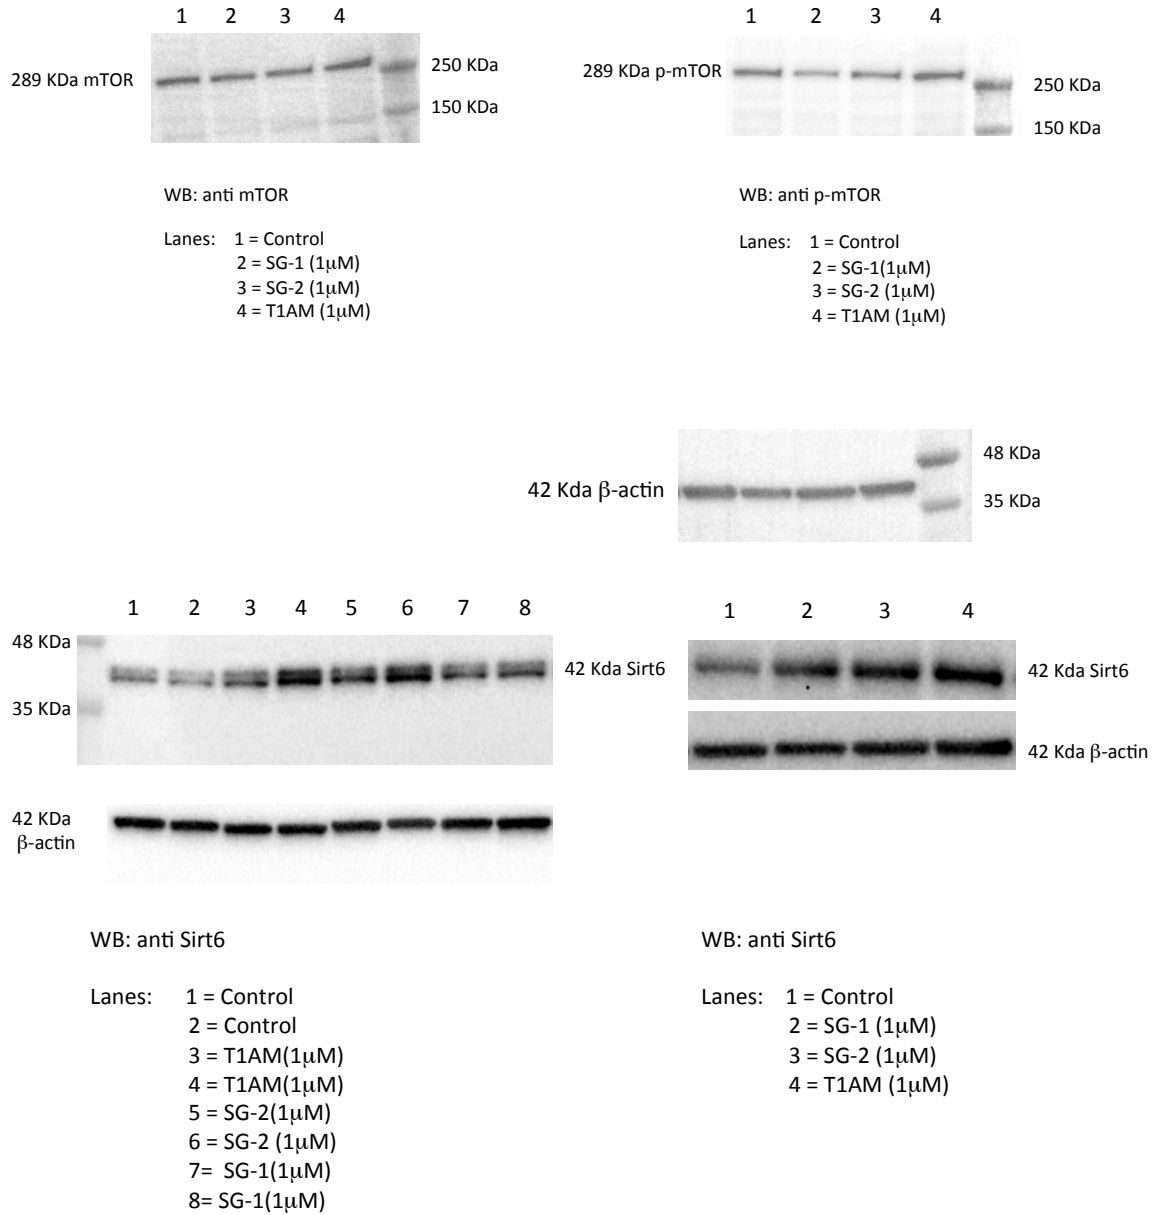

**Supplementary Figure S1. Full-length blots relative to the cropped images showed in Figure 3.** Uncropped Western blots relative to three different gels (n=3) shown in **Figure 3c** of the manuscript. The membranes were cut into sections to enable probing of the same blots with multiple antibodies. Therefore the above membrane sections are the full blots for each antibody.
